# Supplementary material for: Probing the mechanistic role of the long α-helix in subunit L of respiratory Complex I from Escherichia coli by site-directed mutagenesis
Source: PubMed Central journal article supplement (PMC3274701; doi:10.1111/j.1365-2958.2011.07883.x), 2011-11-07

## Supplementary data for:

### Probing the mechanistic role of the long $\alpha$ -helix in subunit L of respiratory Complex I from *Escherichia coli* by site-directed mutagenesis

*Galina Belevich, Juho Knutti, Michael I. Verkhovskiy, Mårten Wikström, Marina Verkhovskaya*

Helsinki Bioenergetics Group, Institute of Biotechnology, PO Box 65 (Viikinkaari 1) FIN-00014  
University of Helsinki, Finland

**Table S1**  
**Oligonucleotide primers used for cloning and mutagenesis of *E.coli* *nuoL* gene**

| Primer                             | Sequence <sup>a</sup>                                                                                |
|------------------------------------|------------------------------------------------------------------------------------------------------|
| <i>for PCR</i>                     |                                                                                                      |
| UpLF                               | ATGGCAGGTATGGCAATCGACG                                                                               |
| UpLXhoR                            | GGTAA <u>CTCGAG</u> CATGTTTCATCCG                                                                    |
| DnLXhoF                            | <u>GCTCGAG</u> GGGCATATAAGAACGTAG                                                                    |
| DnLR                               | ACAGCGGCAGGGAGAAACG                                                                                  |
| UpLNheR                            | GGTAAAGGCTAGCATGTTTCATCCG                                                                            |
| LnNheF                             | ATTCCGCT <u>AGC</u> TTATCTCTGCTTCC                                                                   |
| <i>for mutagenesis<sup>b</sup></i> |                                                                                                      |
| Y590St                             | TGCTGTTAAGTGAGAACGGCTAA <u>ACTGCGCTGGTAT</u>                                                         |
| D542N                              | GGTGGTACAACGCCTGGGGATTTA <u>ACTGGCTGTATG</u>                                                         |
| D542R                              | GGTACAACGCCTGGGGATTT <u>CGCTGGCTGTATGACAA</u>                                                        |
| K551Q                              | ATGACAAAGTGTTTCGTCC <u>CAGCCGTTCCCTGGGTATT</u>                                                       |
| K551E                              | ATGACAAAGTGTTTCGTCC <u>GAGCCGTTCCCTGGGTATT</u>                                                       |
| P552A                              | CAAAGTGTTTCGTCAAGG <u>CGTTCCCTGGGTATTGC</u>                                                          |
| P552Q                              | CAAAGTGTTTCGTCAAGC <u>AGTTCCCTGGGTATTGCCT</u>                                                        |
| P552C                              | TATGACAAAGTGTTTCGTCAAGT <u>GCTTCCCTGGGTATTGCCTGGTTG</u>                                              |
| G532ins <sup>6</sup>               | GCCGTCTGCTGGGC <u>GATGGTGATGGTGACCCTACCTGGTGGTACAAC</u>                                              |
| G532ins <sup>7</sup>               | CCGTCTGCTGGGC <u>CCAGATGGTGATGGTGACCCTACCTGGTGGTACAAC</u>                                            |
| G532sub <sup>7</sup>               | CAACAGTGCGCCGGCCGTCTGCTGGGC <u>CCAGATGGCGACGGCGATCCG</u> GGATTT<br>GACTGGCTGTATGACAAAGTG             |
| P552ins <sup>6</sup>               | GTGTTTCGTCAAGCCGATGGTGATGGTGACCATTCCCTGGGTATTGCC                                                     |
| P552ins <sup>7</sup>               | GTGTTTCGTCAAGCCGATGGTGATGGTGACCCTTTCCCTGGGTATTGCC                                                    |
| P564ins <sup>6</sup>               | TGCTGAAACGCGATCCGGATGGTGATGGTGACCCTGA <u>ACTCAATGATGAAC</u>                                          |
| P564sub <sup>7</sup>               | CCTGGGTATTGCCTGGTTGCTGAAACGCGATCCG <u>GGTGACGGTGATGGTGACCCA</u><br>CCGGCTGTCTTTCCCGCTTTGCAGGTAAAGGTC |
| P572ins <sup>6</sup>               | CAATGATGAACATCCCGGATGGTGATGGTGACCAGCTGTCCTTTCCCGCT                                                   |

<sup>a</sup> New restriction sites are underlined, altered nucleotides are in bold, and nucleotide sequence in insertions/substitutions is shaded

<sup>b</sup> Sequence represents sense primer, antisense primer had reverse complementary sequence



**Fig.S2. Growth curves of NuoL mutants with insertion/substitution in AH in minimal malate medium.**

GR70N, wild type, black squares; GRL3 ( $\Delta$ nucL), red diamonds; G542 $ins^7$ , wine, solid line and cycles; G542 $ins^6$ , wine, dashed line, open cycles; G542 $sub^7$ , wine, dotted line, open cycles with cross, P552 $ins^6$ , green, solid line and triangles; P552 $ins^7$ , green, dashed lane, open triangles; P564 $ins^6$ , blue, solid line and diamonds; P654 $sub^7$ , blue, dashed line, open diamonds; P572 $ins^6$ , dark yellow stars.

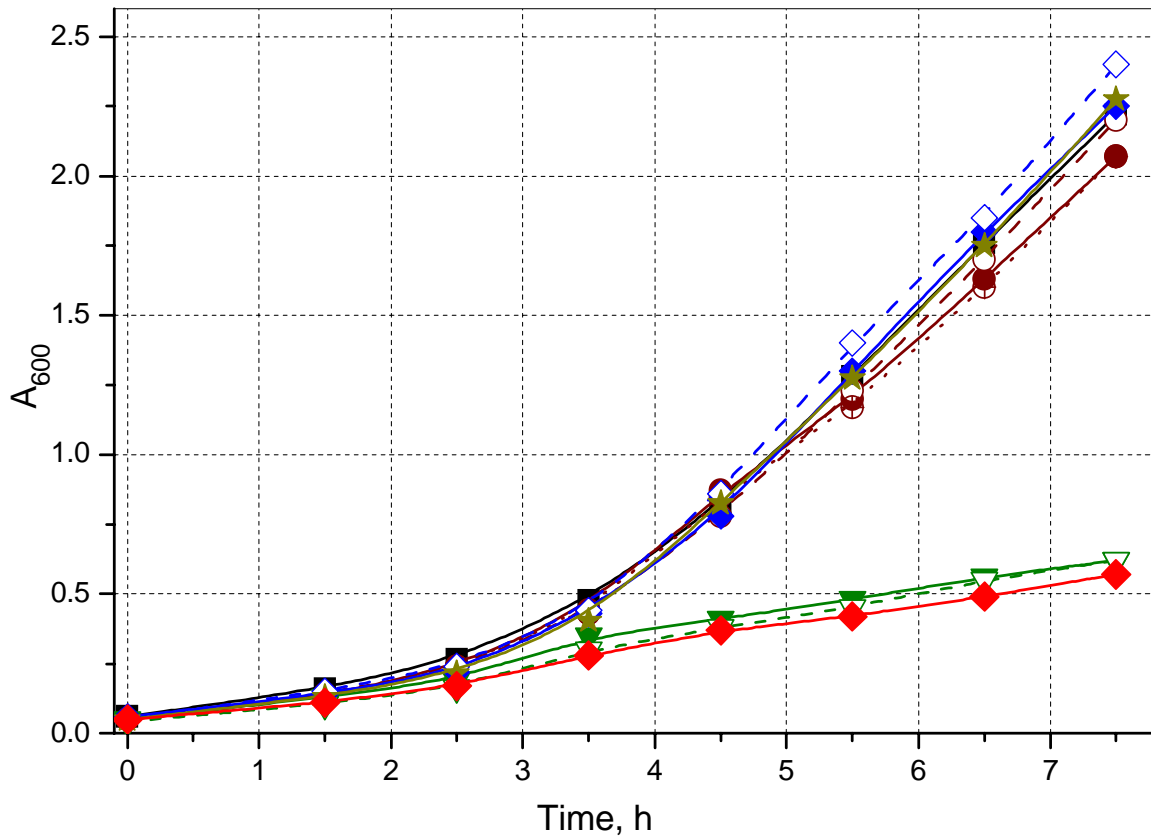

**Fig.S3. SDS-PAGE of purified *E. coli* Complex I.**

Lane 1, molecular mass markers (kDa). Lane 2, P552ins<sup>6</sup> variant. Lane 3, wild type. The assignment of the observed bands to the individual subunits of Complex I is given on the right.

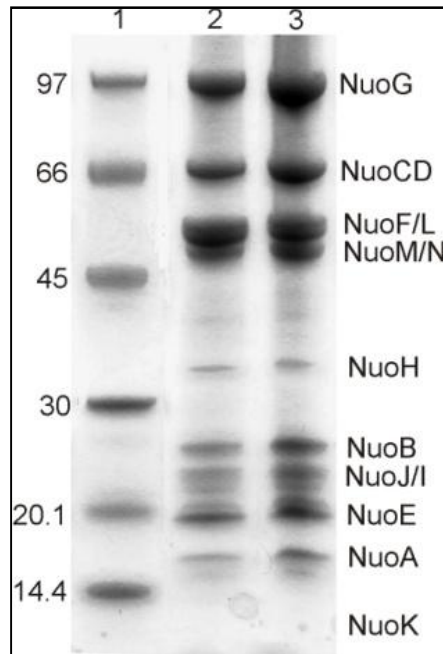

Supplement: mmi0082-1086-SD1.pdf [file mmi0082-1086-SD1.pdf]
